# Supplementary material for: The genetic aetiology of cannabis use: from twin models to genome-wide association studies and beyond
Source: Springer Nature journal article supplement (doi:10.1038/s41398-022-02215-2), 2022-11-21
Supplement: MOESM1 [file 41398_2022_2215_MOESM1_ESM.pdf]

## Supplementary Information

### The genetic etiology of cannabis use: from twin models to genome-wide association studies and beyond.

Karin J.H. Verweij, Jacqueline M. Vink, Abdel Abdellaoui, Nathan A. Gillespie, Eske M. Derks, & Jorien L. Treur

*Supplementary Table 1: GWASs and their sample sizes of traits included in the genetic correlation estimations in Figure 2.*

| <i>Trait</i>                            | <i>N<sub>total</sub></i> | <i>N<sub>cases</sub></i> | <i>N<sub>controls</sub></i> | <i>N<sub>effective</sub></i> |
|-----------------------------------------|--------------------------|--------------------------|-----------------------------|------------------------------|
| <b>Psychiatric disorders:</b>           |                          |                          |                             |                              |
| ADHD <sup>1</sup>                       | 55,374                   | 20,183                   | 35,191                      | 51,306                       |
| PTSD <sup>2</sup>                       | 206,655                  | 32,428                   | 174,227                     | 109,358                      |
| Schizophrenia <sup>3</sup>              | 130,644                  | 53,386                   | 77,258                      | 126,282                      |
| Anxiety <sup>4</sup>                    | 224,330                  | 34,189                   | 190,141                     | 115,914                      |
| Major depression <sup>5</sup>           | 431,394                  | 116,404                  | 314,990                     | 161,090                      |
| Bipolar disorder <sup>6</sup>           | 63,766                   | 11,974                   | 51,792                      | 38,902                       |
| Autism spectrum disorder <sup>7</sup>   | 46,350                   | 18,381                   | 27,969                      | 44,367                       |
| OCD <sup>8</sup>                        | 576,257                  | 14,140                   | 562,117                     | 55,172                       |
| Anorexia <sup>9</sup>                   | 72,517                   | 16,992                   | 55,525                      | 52,042                       |
| <b>Substance use:</b>                   |                          |                          |                             |                              |
| Cocaine dependence <sup>10</sup>        | 6,378                    | 2,085                    | 4,293                       | 5614                         |
| Alcohol dependence <sup>11</sup>        | 46,568                   | 11,569                   | 34,999                      | 34,779.54                    |
| Smoking initiation <sup>12</sup>        | 499,000                  | -                        | -                           | 318,482                      |
| Nicotine dependence <sup>13</sup>       | 58,000                   | -                        | -                           | 58,000                       |
| Alcoholic drinks per week <sup>12</sup> | 399,604                  | -                        | -                           | 262,462                      |
| Cigarettes per day <sup>12</sup>        | 180,438                  | -                        | -                           | 112,757                      |
| Caffeine <sup>14</sup>                  | 91,462                   | -                        | -                           | 91,462                       |
| Alcohol use (AUDIT) <sup>15</sup>       | 121,604                  | -                        | -                           | 121,604                      |
| Smoking cessation <sup>12</sup>         | 240,037                  | -                        | -                           | 149,155                      |
| Age at smoking initiation <sup>12</sup> | 181,780                  | -                        | -                           | 114,119                      |
| <b>Personality:</b>                     |                          |                          |                             |                              |
| Risk Taking <sup>16</sup>               | 466,571                  | -                        | -                           | 466,571                      |
| Extraversion <sup>17</sup>              | 29,501                   | -                        | -                           | 29,501                       |
| Neuroticism <sup>18</sup>               | 390,278                  | -                        | -                           | 390,278                      |
| <b>Cognition &amp; SES:</b>             |                          |                          |                             |                              |
| Townsend <sup>19</sup>                  | 112,151                  | -                        | -                           | 112,151                      |
| Adult IQ <sup>20</sup>                  | 78,308                   | -                        | -                           | 78,308                       |
| Educational attainment <sup>21</sup>    | 245,621                  | -                        | -                           | 245,621                      |
| Household income <sup>22</sup>          | 505,541                  | -                        | -                           | 505,541                      |

*N.B. Effective sample size was provided by the authors of the GWASs or calculated with the following formula:  $4/(1/N_{cases}+1/N_{controls})$ .*

## References

- 1 Demontis, D. & Walters, R. K. Discovery of the first genome-wide significant risk loci for attention deficit/hyperactivity disorder. *Nature genetics* **51**, 63-75, doi:10.1038/s41588-018-0269-7 (2019).
- 2 Nievergelt, C. M. *et al.* International meta-analysis of PTSD genome-wide association studies identifies sex-and ancestry-specific genetic risk loci. *Nature communications* **10**, 1-16 (2019).
- 3 Trubetskoy, V. *et al.* Mapping genomic loci implicates genes and synaptic biology in schizophrenia. *Nature* **604**, 502-508, doi:10.1038/s41586-022-04434-5 (2022).
- 4 Levey, D. F. *et al.* Reproducible genetic risk loci for anxiety: results from ~ 200,000 participants in the Million Veteran Program. *American Journal of Psychiatry* **177**, 223-232 (2020).
- 5 Wray, N. R. *et al.* Genome-wide association analyses identify 44 risk variants and refine the genetic architecture of major depression. **50**, 668-681, doi:10.1038/s41588-018-0090-3 (2018).
- 6 Mullins, N. *et al.* Genome-wide association study of more than 40,000 bipolar disorder cases provides new insights into the underlying biology. *Nature genetics* **53**, 817-829 (2021).
- 7 Meta-analysis of GWAS of over 16,000 individuals with autism spectrum disorder highlights a novel locus at 10q24.32 and a significant overlap with schizophrenia. *Molecular autism* **8**, 1-17 (2017).
- 8 Strom, N. I. *et al.* Genome-wide association study identifies new locus associated with OCD. *medRxiv* (2021).
- 9 Watson, H. J. *et al.* Genome-wide association study identifies eight risk loci and implicates metabo-psychiatric origins for anorexia nervosa. *Nature genetics* **51**, 1207-1214 (2019).
- 10 Cabana-Domínguez, J., Shivalikanjli, A., Fernández-Castillo, N. & Cormand, B. Genome-wide association meta-analysis of cocaine dependence: Shared genetics with comorbid conditions. *Progress in Neuro-Psychopharmacology and Biological Psychiatry* **94**, 109667 (2019).
- 11 Walters, R. K. *et al.* Transancestral GWAS of alcohol dependence reveals common genetic underpinnings with psychiatric disorders. *Nature neuroscience* **21**, 1656-1669 (2018).
- 12 Liu, M., Jiang, Y. & Wedow, R. Association studies of up to 1.2 million individuals yield new insights into the genetic etiology of tobacco and alcohol use. *Nature genetics* **51**, 237-244, doi:10.1038/s41588-018-0307-5 (2019).
- 13 Quach, B. C. *et al.* Expanding the genetic architecture of nicotine dependence and its shared genetics with multiple traits. *Nature communications* **11**, 1-13 (2020).
- 14 Cornelis, M. C. *et al.* Genome-wide meta-analysis identifies six novel loci associated with habitual coffee consumption. *Molecular psychiatry* **20**, 647-656, doi:10.1038/mp.2014.107 (2015).
- 15 Sanchez-Roige, S. *et al.* Genome-wide association study meta-analysis of the Alcohol Use Disorders Identification Test (AUDIT) in two population-based cohorts. *American Journal of Psychiatry* **176**, 107-118 (2019).
- 16 Linnér, R. K. *et al.* Genome-wide association analyses of risk tolerance and risky behaviors in over 1 million individuals identify hundreds of loci and shared genetic influences. *Nature genetics* **51**, 245-257 (2019).
- 17 van den Berg, S. M. *et al.* Meta-analysis of Genome-Wide Association Studies for Extraversion: Findings from the Genetics of Personality Consortium. *Behav Genet* **46**, 170-182, doi:10.1007/s10519-015-9735-5 (2016).
- 18 Nagel, M. *et al.* Meta-analysis of genome-wide association studies for neuroticism in 449,484 individuals identifies novel genetic loci and pathways. *Nature genetics* **50**, 920-927 (2018).
- 19 Hill, W. D. *et al.* Molecular genetic contributions to social deprivation and household income in UK Biobank. *Current Biology* **26**, 3083-3089 (2016).
- 20 Sniekers, S. *et al.* Genome-wide association meta-analysis of 78,308 individuals identifies new loci and genes influencing human intelligence. *Nature genetics* **49**, 1107 (2017).

- 21 Lee, J. J. *et al.* Gene discovery and polygenic prediction from a 1.1-million-person GWAS of educational attainment. *Nature genetics* **50**, 1112 (2018).
- 22 Hill, W. D. *et al.* Genome-wide analysis identifies molecular systems and 149 genetic loci associated with income. *Nature communications* **10**, 5741, doi:10.1038/s41467-019-13585-5 (2019).
